# Supplementary material for: Droplet Evolution and Refinement During Liquid–Liquid Decomposition of Zn-6 Wt Pct Bi Immiscible Alloy Under High Static Magnetic Fields
Source: Springer Nature journal article supplement (doi:10.1007/s11661-018-4638-8), 2018-05-21
Supplement: MOESM1 [file 15780010]

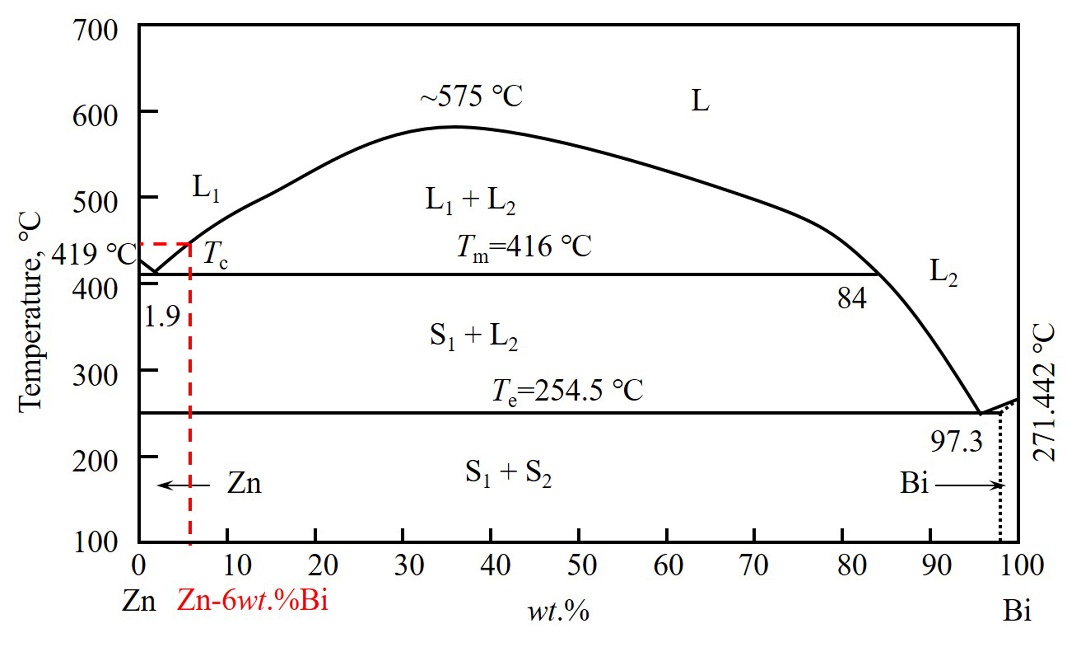


Supplementary figure 1: Phase diagram of Zn-Bi. *T*c is the critical temperature, *T*m is the monotectic reaction temperature, and *T*e is the eutectic reaction temperature. L1 is the liquid Zn-rich phase L2 is the liquid Bi-rich phase, S1 is the solid Zn-rich phase and S2 is the solid Bi-rich phase.
